# Supplementary material for: Fatty acid metabolism constrains Th9 cell differentiation and anti-tumor immunity via modulation of retinoic acid receptor signaling
Source: Research Square preprint supplement (doi:10.21203/rs.3.rs-3839261/v1), 2024-01-17
Supplement: Supplementary file 1 [file 648e9c359890b2ad49c8931e.xlsx]

## Sheet: Sheet1
																	,
	Supplementary Table 2. The lists of genes commonly elevated more than 2-fold in RNA-seq and ChIP-seq of Th9 or Th17 cells
	Th9 (76 genes)				Th17 (109 genes)
	Abca1	Gfi1	Oasl2		AA467197	Dcun1d3	Ildr1	Prr5l
	Abcg1	Gpt2	Phf11a		Aars	Ddx60	Inhba	Rab39b
	Adar	H1fx	Plin2		Abca1	Dennd5a	Ipcef1	Rsad2
	Agap1	Herc6	Rab39b		Abcg1	Eif2ak2	Irf7	Rtp4
	Akr1c13	Ifi214	Riox2		Adam8	Gadd45b	Irf9	Slc25a33
	Aldh1a3	Ifi27	Rnf11		Adar	Gbp4	Isg20	Slc7a3
	Anxa3	Ifi27l2a	Rsad2		Agap1	Gbp8	Kynu	Slco3a1
	Avil	Ifi44	Rtp4		Ankrd33b	Gbp9	Lgals3bp	Slfn1
	Batf3	Iigp1	Sdc3		Anxa3	H1fx	Mdm1	Slfn3
	BC147527	Il1rn	Selp		Aqp9	H2-Q6	Med7	Slfn8
	Casp1	Il21	Shfl		Asns	Herc6	Mex3c	Srxn1
	Casp4	Il6	Slc16a10		Atf3	Ifi203	Mlkl	Stat1
	Casz1	Il9	Slc4a11		Atp8b4	Ifi209	Mndal	Tagap
	Cd86	Ildr1	Slc7a2		Avil	Ifi211	Msc	Tlr7
	Cox6a2	Inhba	Slc7a3		Batf3	Ifi213	Ncoa7	Tmcc3
	Ddx60	Klf6	Slfn1		Bbc3	Ifi214	Oas3	Tnfsf15
	Dlg2	Lgals3bp	Srxn1		BC147527	Ifi27	Oasl1	Tnfsf8
	Enpp4	Lilr4b	Tdrd7		Bst2	Ifi44	Oasl2	Trim12c
	Etv5	Ly6a	Tlr7		Casp1	Ifih1	Parp10	Trim30a
	Fgl2	Ly75	Tmcc3		Casp4	Ifit1	Parp11	Trim30d
	Frmd4a	Mgll	Trim30a		Casz1	Ifit2	Parp12	Trim34a
	Ftl1	Msc	Trim30d		Ccrl2	Ifit3	Parp14	Uba7
	Gadd45a	Mtmr7	Usp18		Cd86	Iigp1	Pdcd1lg2	Usp18
	Gbp8	Neb	Usp2		Cmpk2	Il13	Phf11a	Wls
	Gbp9	Oas3	Xaf1		Cox6a2	Il1rl2	Phf11b	Xaf1
			Zfp608		Cth	Il1rn	Phf11c	Zbp1
					Cxcl10	Il9	Plscr1	Zbtb10
								Zbtb46
