# Supplementary material for: Fatty acid metabolism constrains Th9 cell differentiation and anti-tumor immunity via modulation of retinoic acid receptor signaling
Source: Research Square preprint supplement (doi:10.21203/rs.3.rs-3839261/v1), 2024-01-17
Supplement: Supplementary file 2 [file 7c7f55e4a3b2f7c74717adb7.xlsx]

## Sheet: Sheet1
	Supplementary Table 1. qRT-PCR primer
	For mouce
	Gene
	Acaca FW	5’-CCAATGGTTGAGTGGGTTTT-3’
	Acaca RV	5’-CGGGTATTCCCCCTAACCT-3’
	Acsl3 FW	5’-CGGCTGTCTGAAGATCATTG-3’
	Acsl3 RV	5’-TTCAAAGCTGCCTCTACTTTCC-3’
	Batf3 FW	5’-AGAAGGCTGACAAGCTCCAC-3’
	Batf3 RV	5’-CCTTCAGCTTCGAAATCTCC-3’
	Elovl1 FW	5’-CCCTGAGAAGAAGGGAGGAG-3’
	Elovl1 RV	5’-TCCATCCTGGCTAAGGACTC-3’
	Elovl5 FW	5’-GTCCTCCATCCCGTCCAT-3’
	Elovl5 RV	5’-CTGGATGATTGTCAGCACAAA-3’
	Fads2 FW	5’-CGGGAGAAGATGCTACGG-3’
	Fads2 RV	5’-TTCAAGAACTTGCCCACGA-3’
	Hprt FW	5’-TCCTCCTCAGACCGCTTTT-3’
	Hprt RV	5’-CCTGGTTCATCATCGCTAATC-3’
	Irf4 FW	5’-AGCACCTTATGGCTCTCTGC-3’
	Irf4 RV	5’-TGACTGGTCAGGGGCATAAT-3’
	Il9 FW	5’-GCCTCTGTTTTGCTCTTCAGTT-3’
	Il9 RV	5’-GCATTTTGACGGTGGATCAT-3’
	Ldlr FW	5’-CAAGAGGCAGGGTCCAGA-3’
	Ldlr RV	5’-CCAATCTGTCCAGTACATGAAGC-3’
	Lrp8 FW	5’-CTCCCGAAGAACCCTCTTTC-3’
	Lrp8 RV	5’-CTTCAAGACTTAATGCCACTCG-3’
	Scd1 FW	5’-TTCCCTCCTGCAAGCTCTAC-3’
	Scd1 RV	5’-CAGAGCGCTGGTCATGTAGT-3’
	Scd2 FW	5’-TGGTTTCCATGGGAGCTG-3’
	Scd2 RV	5’-TTGATGTGCCAGCGGTACT-3’
	Vldlr FW	5’-GCCCGTTCTACTCAGTGTATCC-3’
	Vldlr RV	5’-GAACTCATCTGCACTACATGTTATGTT-3’
	18S FW	5’-GCTCTAGAATTACCACAGTTATCCAA-3’
	18S RV	5’-CCTGGTTCATCATCGCTAATC-3’
	For human
	Gene
	hBATF3 FW	5’-CTGACAAGCTCCATGAGGAAT-3’
	hBATF3 RV	5’-GCACATCTTCTCGTGCTCCT-3’
	hHPRT FW	5’-TGACCTTGATTTATTTTGCATACC-3’
	hHPRT RV	5’-CGAGCAAGACGTTCAGTCCT-3’
	hIL9 FW	5’-GACCAGTTGTCTCTGTTTGGGC-3’
	hIL9 RV	5’-TTTCACCCGACTGAAAATCAGTGG-3’
	hIRF4 FW	5’-GACCGAAGCTGGAGGGACTA-3’
	hIRF4 RV	5’-CTGTCACCTGGCAACCATTTT-3’
	hSPI1 FW	5’-ATCCTGAGGGGCTCTGCATT-3’
	hSPI1 RV	5’-AGGTCTTCTGATGGAGGGGG-3’
	h18S	5’-CCGATTGGATGGTTTAGTGAG-3’
	h18S	5’-AGTTCGACCGTCTTCTCAGC-3’
